# Supplementary material for: miR-455 targets FABP4 to protect human endometrial stromal cells from cytotoxicity induced by hydrogen peroxide
Source: PubMed Central journal article supplement — Mol Med Rep. 2019 Oct 4;20(6):4781–90. doi: 10.3892/mmr.2019.10727 (PMC6854537; doi:10.3892/mmr.2019.10727), 2019-10-04

Figure S1. Schematic diagram of the pmirGLO vector.

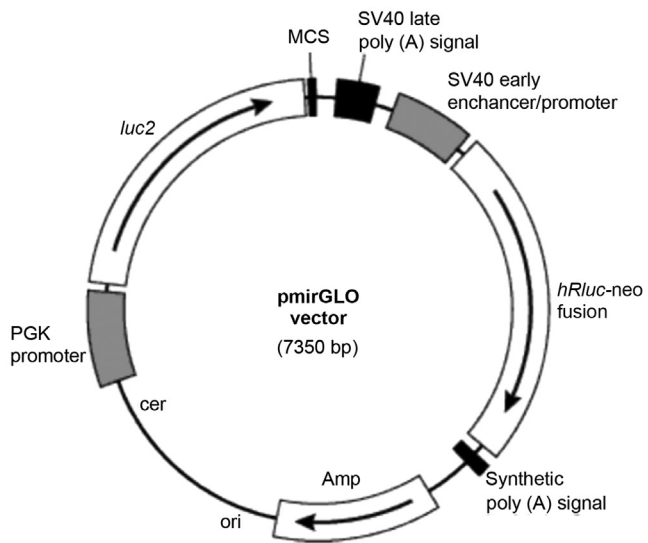

Figure S2. Annexin V-FITC/PI staining for determination of cell apoptosis. The HESCs were treated as indicated for 24 h, and the cells were then stained with Annexin V-FITC/PI and examined by flow cytometry. HESCs, human endometrial stromal cells; PI, propidium iodide.

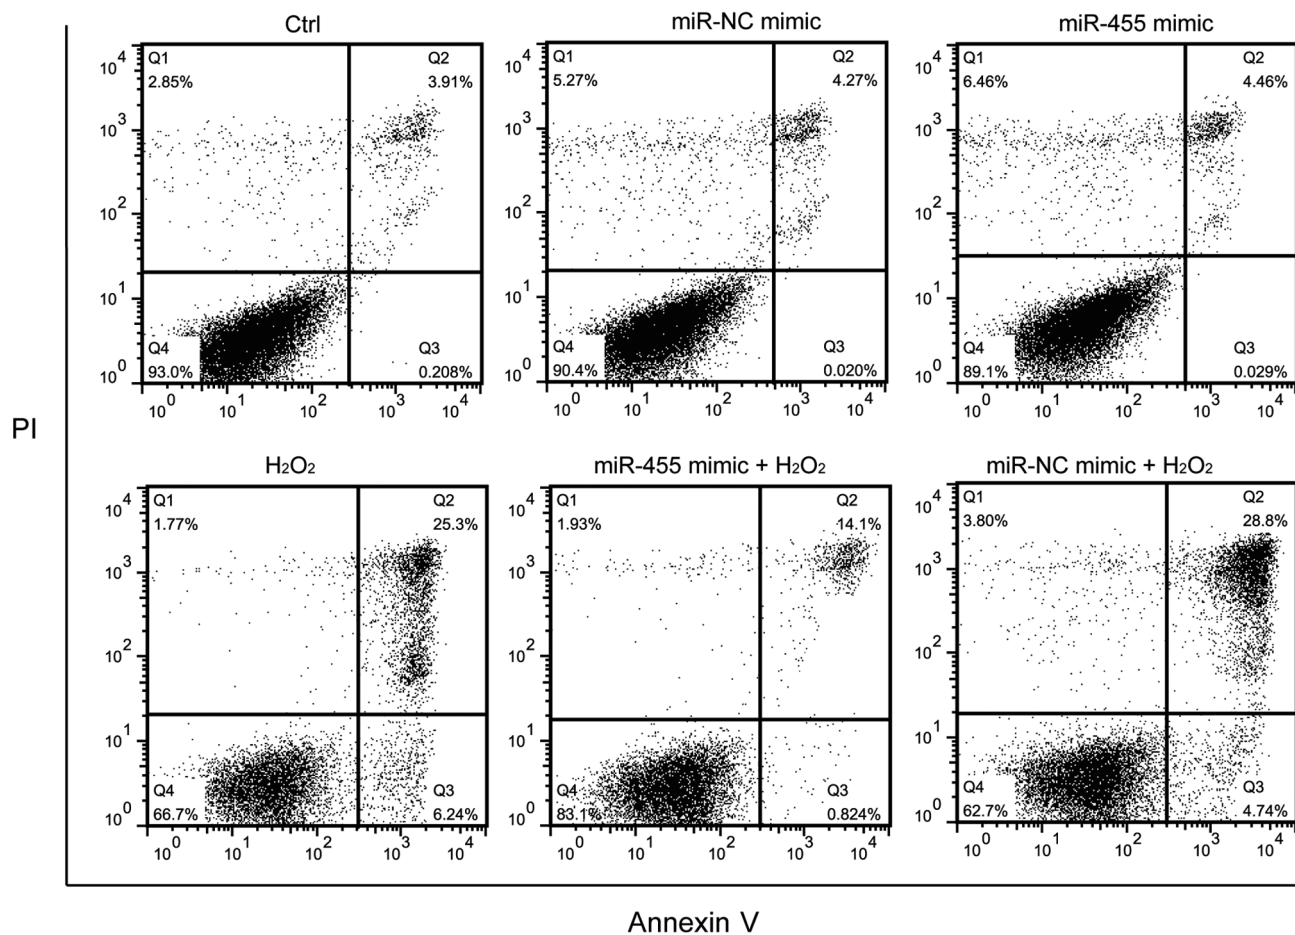

Figure S3. Annexin V-FITC/PI staining for determination of cell apoptosis. The HESCs were treated as indicated for 24 h, then cells were stained with Annexin V-FITC/PI and examined by flow cytometry. HESCs, human endometrial stromal cells; PI, propidium iodide.

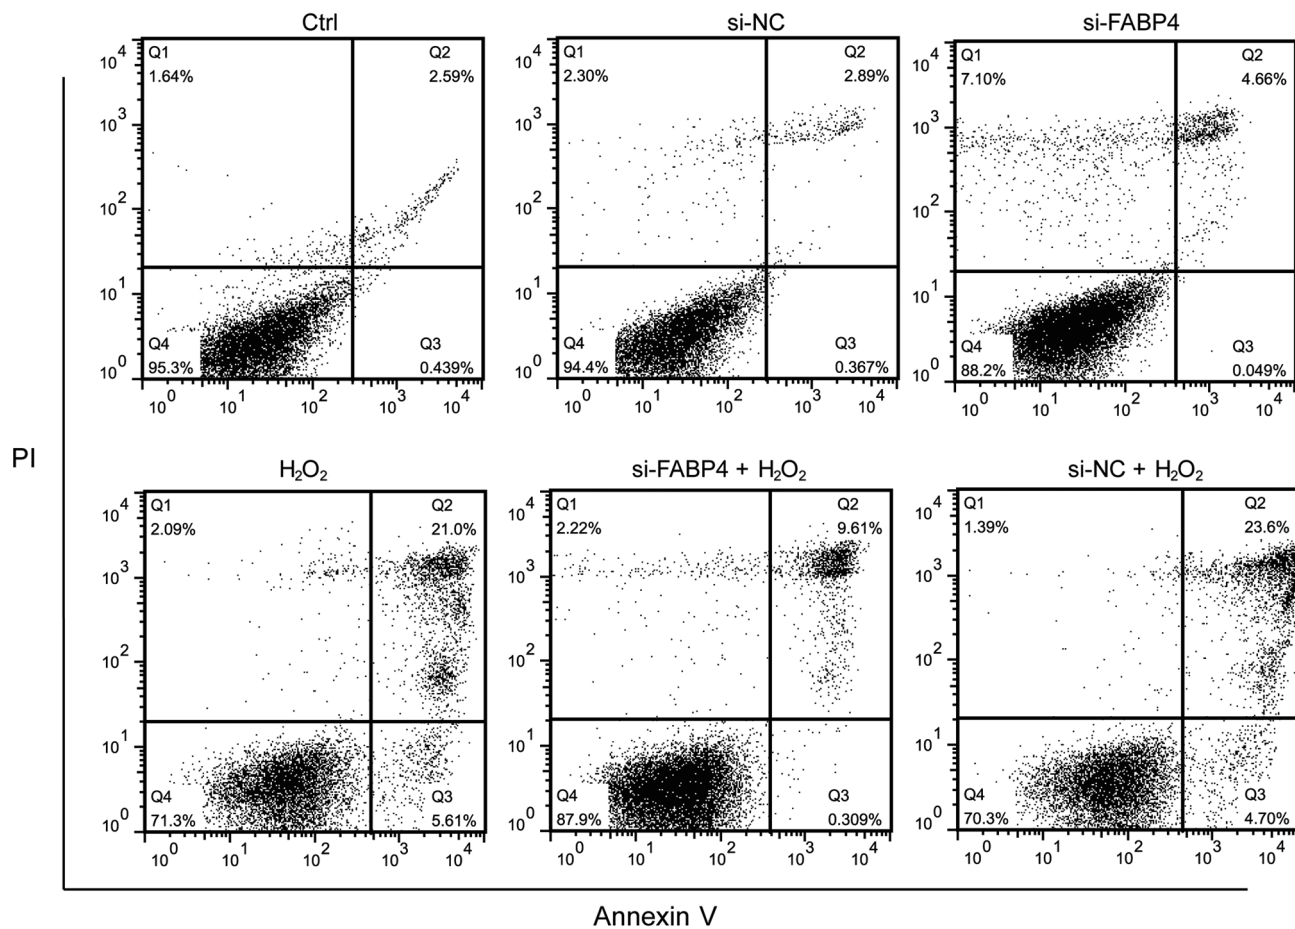

Figure S4. Annexin V-FITC/PI staining for determination of cell apoptosis. PI, propidium iodide.

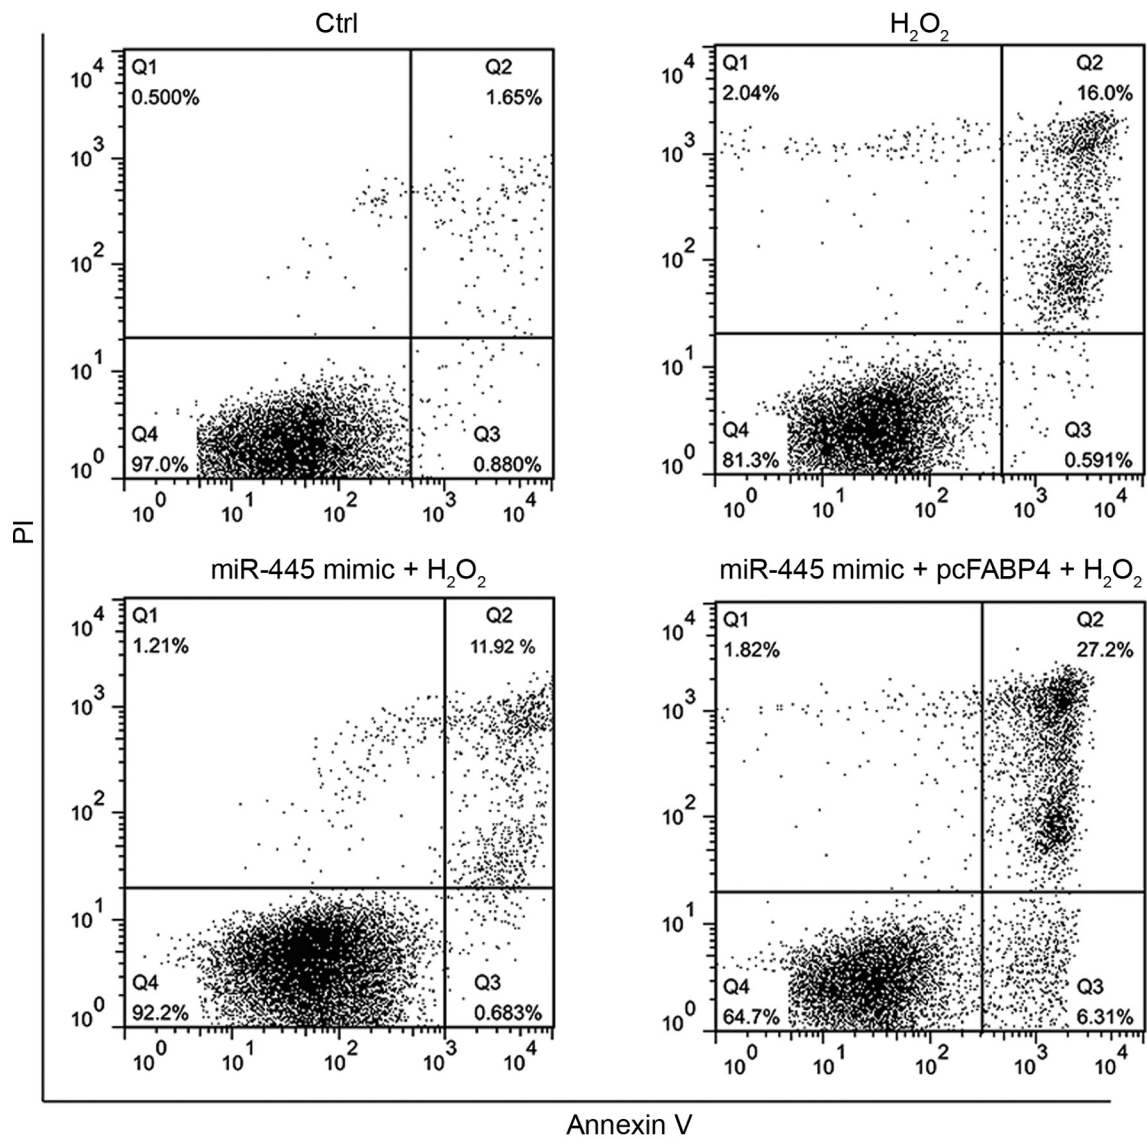

Supplement: Supplementary_Data.pdf [file Supplementary_Data.pdf]
